# Supplementary material for: Discovery of Genome-Wide DNA Polymorphisms in a Landrace Cultivar of Japonica Rice by Whole-Genome Sequencing
Source: PubMed Central journal article supplement — Plant Cell Physiol. 2011 Jan 21;52(2):274–82. doi: 10.1093/pcp/pcr003 (PMC3037082; doi:10.1093/pcp/pcr003), 2011-01-21
Supplement: supp_pcr003_SupFig1_v3.pdf [file supp_pcr003_SupFig1_v3.pdf]

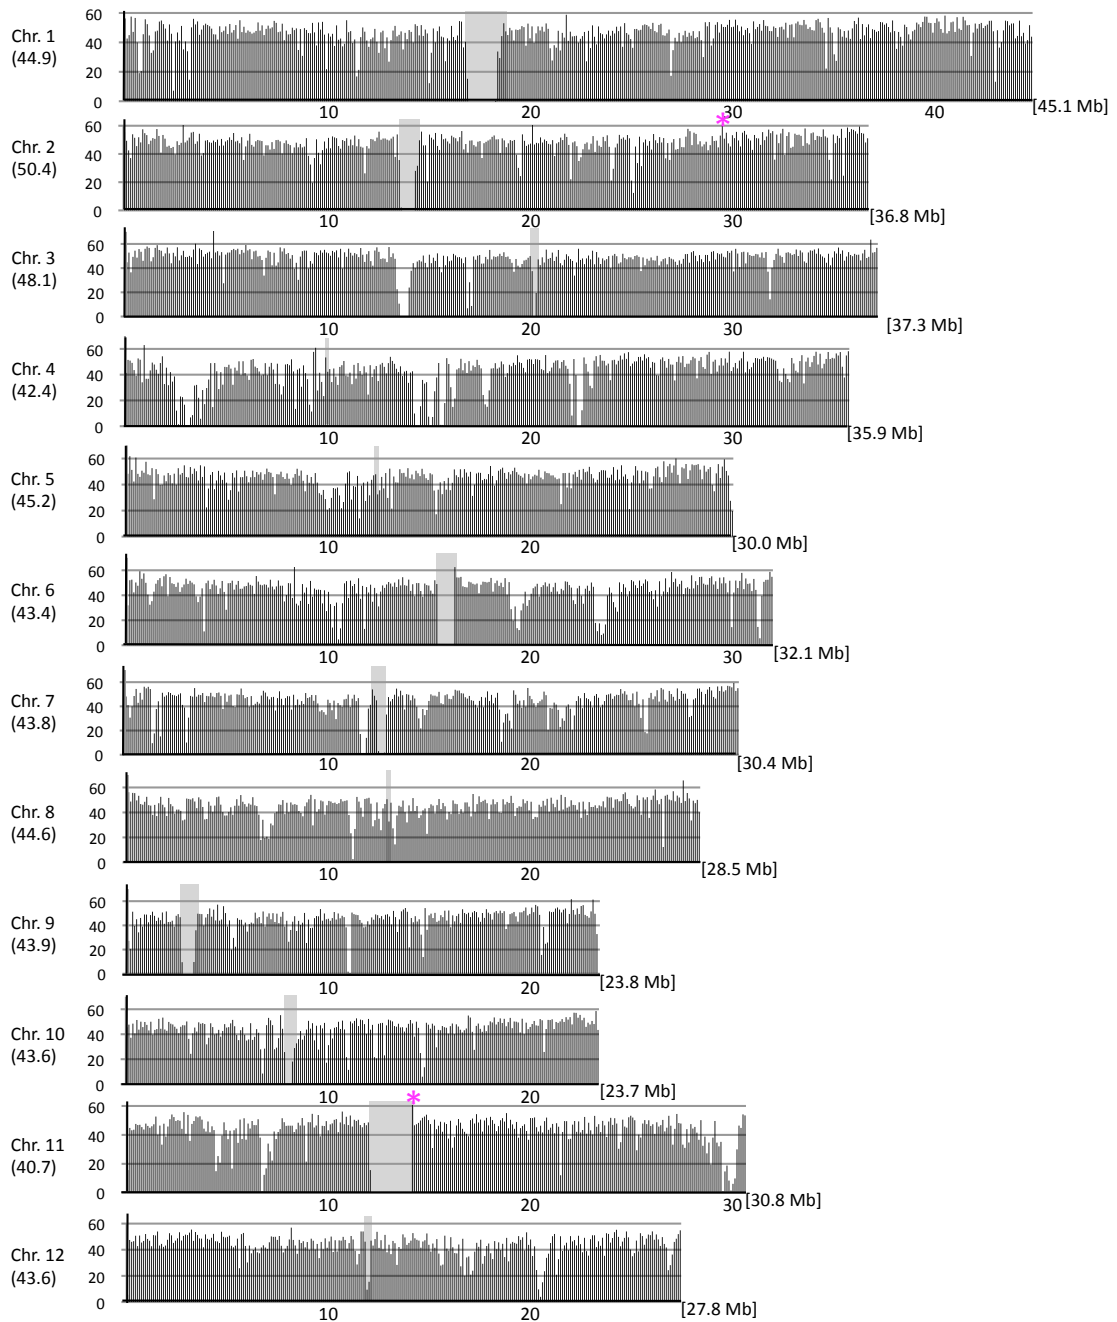

Supplementary Figure S1. Sequencing depth of the Omachi short reads generated using the GA sequencer with reference to the Nipponbare genome. The sequencing depth in each chromosome is shown in parentheses. The mean total sequencing depth was  $45.0\times$  the genome. The x-axis shows the physical distance along the Nipponbare genome. Total genome size of each chromosome is shown in brackets. The y-axis shows the sequencing depth, which represents the mean number of reads mapped in 100-kb windows. The grey areas show centromere regions. Read depths over 100 are indicated by red asterisks.
