# Supplementary material for: Discovery of Genome-Wide DNA Polymorphisms in a Landrace Cultivar of Japonica Rice by Whole-Genome Sequencing
Source: PubMed Central journal article supplement — Plant Cell Physiol. 2011 Jan 21;52(2):274–82. doi: 10.1093/pcp/pcr003 (PMC3037082; doi:10.1093/pcp/pcr003), 2011-01-21
Supplement: supp_pcr003_SupFig2_v3.pdf [file supp_pcr003_SupFig2_v3.pdf]

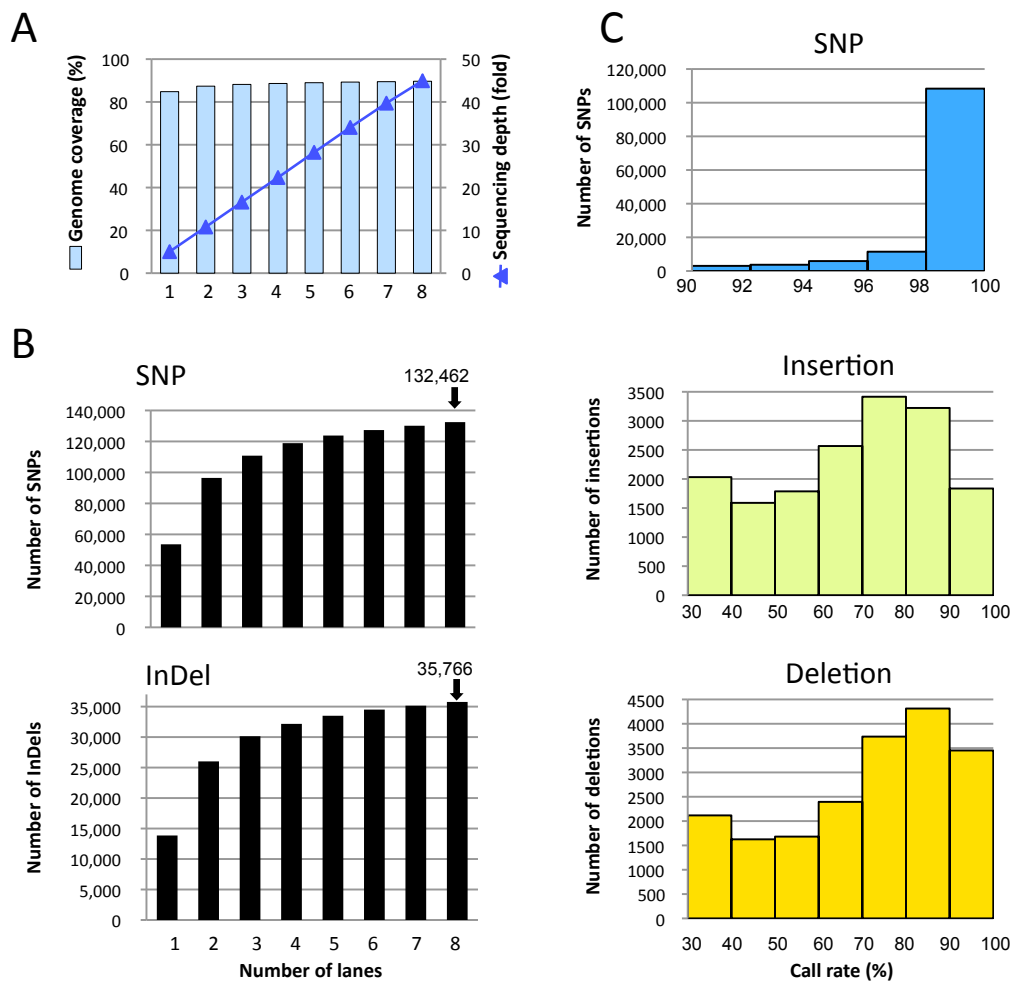

Supplementary Figure S2. Relationships among genome coverage, sequencing depth, call rate and the number of detected SNPs and InDels. (A) Blue bars correspond to the left vertical scale (% coverage of the genome by the mapped GA reads) and the blue line corresponds to the right vertical scale (sequencing depths merged stepwise). (B) The number of identified SNPs and InDels in each lane was merged stepwise. (C) Call rate (%) of SNPs, Insertions, and deletions.
