# Supplementary material for: Discovery of Genome-Wide DNA Polymorphisms in a Landrace Cultivar of Japonica Rice by Whole-Genome Sequencing
Source: PubMed Central journal article supplement — Plant Cell Physiol. 2011 Jan 21;52(2):274–82. doi: 10.1093/pcp/pcr003 (PMC3037082; doi:10.1093/pcp/pcr003), 2011-01-21
Supplement: supp_pcr003_SupFig3_v3.pdf [file supp_pcr003_SupFig3_v3.pdf]

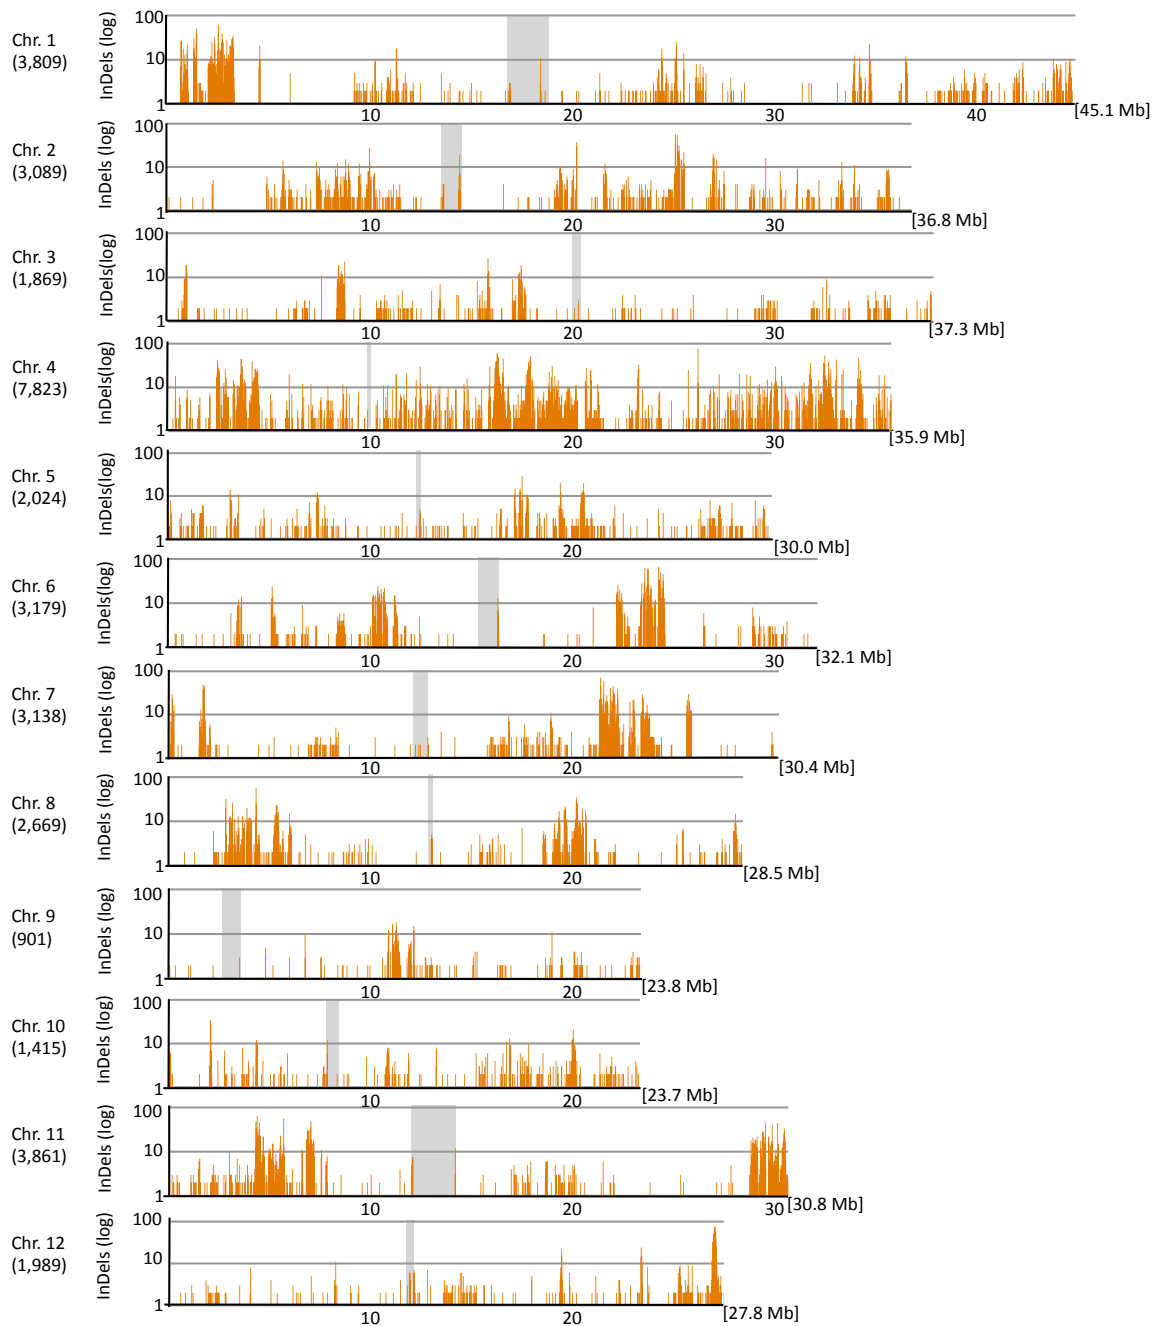

Supplementary Figure S3. Distribution of InDels in the 12 rice chromosomes between Omachi and Nipponbare. The x-axis represents the physical distance along each chromosome, split into 100-kb windows. Total genome size of each chromosome is shown in brackets. The y-axis indicates the number of InDels. The number of InDels in each chromosome is shown in parentheses.
