# Supplementary material for: Discovery of Genome-Wide DNA Polymorphisms in a Landrace Cultivar of Japonica Rice by Whole-Genome Sequencing
Source: PubMed Central journal article supplement — Plant Cell Physiol. 2011 Jan 21;52(2):274–82. doi: 10.1093/pcp/pcr003 (PMC3037082; doi:10.1093/pcp/pcr003), 2011-01-21
Supplement: supp_pcr003_SupFig4_v3.pdf [file supp_pcr003_SupFig4_v3.pdf]

|                | Nipponbare | Omachi | Koshihikari | Norin8 | Kameji |
|----------------|------------|--------|-------------|--------|--------|
| chr02_30320299 | A          | B      | A           | A      | A      |
| chr02_30320334 | A          | B      | A           | A      | A      |
| chr02_30331173 | A          | B      | A           | A      | A      |
| chr02_31119830 | A          | B      | B           | A      | B      |
| chr02_31152340 | A          | B      | N           | N      | N      |
| chr02_33199272 | A          | B      | B           | A      | A      |
| chr02_33351539 | A          | B      | B           | A      | A      |
| chr02_33365691 | A          | B      | B           | A      | A      |
| chr02_33365652 | A          | B      | B           | A      | A      |
| chr02_33440362 | A          | B      | B           | A      | A      |
| chr02_33680708 | A          | B      | B           | A      | B      |
| chr02_33886871 | A          | B      | A           | A      | A      |
| chr02_35563967 | A          | B      | A           | A      | B      |
| chr02_35626171 | A          | B      | A           | A      | B      |
| chr02_35631401 | A          | B      | A           | A      | B      |
| chr02_35632310 | A          | B      | A           | A      | B      |
| chr02_35632375 | A          | B      | A           | A      | B      |
| chr02_35643346 | A          | B      | A           | A      | B      |
| chr02_35644240 | A          | B      | A           | A      | B      |
| chr02_36457467 | A          | B      | B           | B      | N      |

Supplementary Figure S4. Graphical representation of the genotype of five *japonica* rice cultivars using InDels as DNA markers. Nipponbare and Omachi InDel types are indicated as ‘A’ in yellow boxes and ‘B’ in green boxes, respectively. ‘N’ indicates that no stable fragments were amplified.
