# Supplementary material for: Discovery of Genome-Wide DNA Polymorphisms in a Landrace Cultivar of Japonica Rice by Whole-Genome Sequencing
Source: PubMed Central journal article supplement — Plant Cell Physiol. 2011 Jan 21;52(2):274–82. doi: 10.1093/pcp/pcr003 (PMC3037082; doi:10.1093/pcp/pcr003), 2011-01-21
Supplement: supp_pcr003_SupTale_2.pdf [file supp_pcr003_SupTale_2.pdf]

Supplementary Table S2. Validation of insertions and deletions by Sanger method.

| Position       | InDel sequenced by |                   |
|----------------|--------------------|-------------------|
|                | GA analysis        | Sanger method     |
| Insertion      |                    |                   |
| chr02_30320299 | +gacaa             | +aaaaaacgacaa     |
| chr02_30331173 | +gcacat            | +aagcctatggcgca   |
| chr02_33365691 | +ttgtt             | +ttttg            |
| chr02_33440362 | +gaaag             | +gaaag            |
| chr02_35643346 | +tgtag             | +tgtag            |
| chr02_35644240 | +atcta             | +atcca            |
| chr02_36457467 | +tcctc             | +tcctc            |
| Deletion       |                    |                   |
| chr02_30320334 | -ctttg             | -tnactgtt         |
| chr02_31119830 | -tacatatac         | -tacatatac        |
| chr02_31152340 | -gagcgt            | -gagcgt           |
| chr02_33199272 | -atggcgtactttc     | -atggcgtactttc    |
| chr02_33351539 | -caagag            | -aagagttgg        |
| chr02_33365652 | -caacc             | -aacgaacattcaacc  |
| chr02_33680708 | -aacacat           | -aacacat          |
| chr02_33886871 | -ttacatatttagtgca  | -ttacatatttagtgca |
| chr02_35563967 | -cgaga             | -cgaga            |
| chr02_35626171 | -aaaaac            | -aaaaac           |
| chr02_35631401 | -cttgc             | -tgacactct        |
| chr02_35632310 | -cggcaagccac       | -cggcaagccactg    |
| chr02_35632375 | -cccatata          | -cccatata         |

Mismatches between Sanger and GA sequences are indicated as blue.
